# Supplementary material for: Gene Expression Profile Reveals a Prognostic Signature of Non–MSI-H/pMMR Colorectal Cancer
Source: Front Cell Dev Biol. 2022 Feb 17;10:790214. doi: 10.3389/fcell.2022.790214 (PMC8891566; doi:10.3389/fcell.2022.790214)
Supplement: Supplementary file 2 [file Table3.XLSX]

## Sheet: Sheet1
Table S2. The primer sequences and coefficient of the included six genes.
Ensembl	Genes	Forward (5’- to 3’-)	Reverse (5’- to 3’-)	Coefficient
ENSG00000271133	ITGB8-AS1	CGTGATCCCAACCTTAGCAAC	ACTCCATAGCACTGGCACCTGA	-0.189
ENSG00000133216	EPHB2	ACGCCACAGCCATAAAAAGC	TCATGCCTGGGGTCACTTCT	-0.27
ENSG00000172238	ATOH1	CCTTCCAGCAAACAGGTGAAT	TTGTTGAACGACGGGATAACAT	-0.319
ENSG00000131373	HACL1	TATCTGACAAGCAGGCCCTTG	GCGGGCAGAGAACTTGGTAT	-0.196
ENSG00000259820	lnc-ZFAT-1	CACCAACAACCAGCAGTTCTTTAC	TCTTGCCTATGCTCCTTGTCTTT	0.237
ENSG00000178965	ERICH3	TTCAGGAACTCCATAGGCAATTC	GGTTGGACGAAATCTTCTCCTT	0.311
